# Supplementary material
Source: ML conference proceedings conference paper supplement (https://openaccess.thecvf.com/content/CVPR2023/html/Zhang_Transforming_Radiance_Field_CVPR_2023_paper.html)
Supplement: Supplementary file 1 [file Zhang_Transforming_Radiance_Field_CVPR_2023_supplemental.zip]

# Transforming Radiance Field with Lipschitz Network for Photorealistic 3D Scene Stylization —CVPR 2023 Supplementary Material

Zicheng Zhang   Yinglu Liu   Congying Han\*   Yingwei Pan   Tiande Guo   Ting Yao  
University of Chinese Academy of Sciences   JD AI Research   HiDream.ai Inc.

zhangzicheng19@mails.ucas.ac.cn   liuyinglu1@jd.com   hancy@ucas.ac.cn  
panyw.ustc@gmail.com   tdguo@ucas.ac.cn   tingyao.ustc@gmail.com

## A. Proofs

**Proposition 1.** Considering  $f(\mathbf{c}) = \mathbf{A}\mathbf{c} + \mathbf{b}$ ,  $\mathbf{A} \in \mathbb{R}^{3 \times 3}$ ,  $\mathbf{b} \in \mathbb{R}^{3 \times 1}$ , if  $\mathbf{F}'_{app} = f \circ \mathbf{F}_{app}$ ,  $\sum_{i=1}^T w_i = 1$  and  $vr(\mathbf{r}_1, \mathbf{r}_2; \mathbf{F}) < \epsilon$ , we have  $vr(\mathbf{r}_1, \mathbf{r}_2; \mathbf{F}') < K\epsilon$ , where  $K = \|\mathbf{A}\|_2$  is the Lipschitz constant of  $f$ .

*Proof.*

$$\begin{aligned} vr(\mathbf{r}_1, \mathbf{r}_2; \mathbf{F}') &= \|C(\mathbf{r}_1; \mathbf{F}') - C(\mathbf{r}_2; \mathbf{F}')\| \\ &= \left\| \sum_{i=1}^T w_i^{\mathbf{r}_1} f(\mathbf{c}_i^{\mathbf{r}_1}) - \sum_{i=1}^T w_i^{\mathbf{r}_2} f(\mathbf{c}_i^{\mathbf{r}_2}) \right\| \\ &= \left\| \sum_{i=1}^T w_i^{\mathbf{r}_1} (\mathbf{A}\mathbf{c}_i^{\mathbf{r}_1} + \mathbf{b}) - \sum_{i=1}^T w_i^{\mathbf{r}_2} (\mathbf{A}\mathbf{c}_i^{\mathbf{r}_2} + \mathbf{b}) \right\| \\ &= \left\| \sum_{i=1}^T w_i^{\mathbf{r}_1} \mathbf{A}\mathbf{c}_i^{\mathbf{r}_1} - \sum_{i=1}^T w_i^{\mathbf{r}_2} \mathbf{A}\mathbf{c}_i^{\mathbf{r}_2} \right\| \\ &= \left\| \mathbf{A} \left( \sum_{i=1}^T w_i^{\mathbf{r}_1} \mathbf{c}_i^{\mathbf{r}_1} - \sum_{i=1}^T w_i^{\mathbf{r}_2} \mathbf{c}_i^{\mathbf{r}_2} \right) \right\| \\ &\leq \|\mathbf{A}\| \left\| \sum_{i=1}^T w_i^{\mathbf{r}_1} \mathbf{c}_i^{\mathbf{r}_1} - \sum_{i=1}^T w_i^{\mathbf{r}_2} \mathbf{c}_i^{\mathbf{r}_2} \right\| \\ &= \|\mathbf{A}\| vr(\mathbf{r}_1, \mathbf{r}_2; \mathbf{F}) \\ &< K\epsilon \end{aligned}$$

□

**Lemma 1.** Given  $f = f_l \circ \dots \circ f_1$ ,  $f_j(x) = \mathbf{A}_j x + \mathbf{b}$  if  $j = l$  and  $\sigma(\mathbf{A}_j x)$  otherwise, where  $\sigma$  is a 1-Lipschitz function. Then  $K = \prod_{j=1}^l \|\mathbf{A}_j\|_2$  is the Lipschitz constant of  $f$ .

*Proof.* Suppose that inputs  $x, y$  belong to the domain of  $f_j$ ,

$$\begin{aligned} \|f_j(x) - f_j(y)\| &\leq \|\sigma(\mathbf{A}_j x) - \sigma(\mathbf{A}_j y)\| \\ &\leq \|\mathbf{A}_j x - \mathbf{A}_j y\| \\ &\leq \|\mathbf{A}_j\| \|x - y\|. \end{aligned} \tag{1}$$

\*Corresponding author

When  $l = 2$ , the claim is clearly valid. The remaining cases can be easily proved by induction. □

**Proposition 2.** Considering  $f = f_l \circ \dots \circ f_1$ ,  $f_j(x) = \mathbf{A}_j x + \mathbf{b}$  if  $j = l$  and  $\sigma(\mathbf{A}_j x)$  otherwise, where  $\sigma = \max(0, x)$ . If  $\mathbf{F}'_{app} = f \circ \mathbf{F}_{app}$ ,  $\sum_{i=1}^T w_i = 1$  and  $\max_{i=1, \dots, T} \|w_i^{\mathbf{r}_1} \mathbf{c}_i^{\mathbf{r}_1} - w_i^{\mathbf{r}_2} \mathbf{c}_i^{\mathbf{r}_2}\| < \epsilon/T$ , we have  $vr(\mathbf{r}_1, \mathbf{r}_2; \mathbf{F}') < K\epsilon$ , where  $K = \prod_{j=1}^l \|\mathbf{A}_j\|_2$  is the Lipschitz constant of  $f$ .

*Proof.* Note that  $\forall a \in \mathbb{R}^+$  and  $1 \leq j < l$ ,  $a f_j(x) = a \sigma(\mathbf{A}_j x) = \sigma(a \mathbf{A}_j x) = f_j(ax)$ . Denoting  $f^j = f_j \circ \dots \circ f_1$ , we can get the following derivation:

$$\begin{aligned} a f^j(x) &= a \sigma(\mathbf{A}_j f^{j-1}(x)) = \sigma(a \mathbf{A}_j f^{j-1}(x)) \\ &= \sigma(a \mathbf{A}_j \sigma(\mathbf{A}_{j-1} f^{j-2}(x))) \\ &= \sigma(\mathbf{A}_j \sigma(a \mathbf{A}_{j-1} f^{j-2}(x))) \\ &\dots \\ &= f^j(ax). \end{aligned} \tag{2}$$

Because the weights are always non-negative in the volume rendering integral, we further have

$$\begin{aligned} vr(\mathbf{r}_1, \mathbf{r}_2; \mathbf{F}') &= \|C(\mathbf{r}_1; \mathbf{F}') - C(\mathbf{r}_2; \mathbf{F}')\| \\ &= \left\| \sum_{i=1}^T w_i^{\mathbf{r}_1} f(\mathbf{c}_i^{\mathbf{r}_1}) - \sum_{i=1}^T w_i^{\mathbf{r}_2} f(\mathbf{c}_i^{\mathbf{r}_2}) \right\| \\ &= \left\| \sum_{i=1}^T w_i^{\mathbf{r}_1} \mathbf{A}_l f^{l-1}(\mathbf{c}_i^{\mathbf{r}_1}) - \sum_{i=1}^T w_i^{\mathbf{r}_2} \mathbf{A}_l f^{l-1}(\mathbf{c}_i^{\mathbf{r}_2}) \right\| \\ &= \left\| \sum_{i=1}^T \mathbf{A}_l f^{l-1}(w_i^{\mathbf{r}_1} \mathbf{c}_i^{\mathbf{r}_1}) - \sum_{i=1}^T \mathbf{A}_l f^{l-1}(w_i^{\mathbf{r}_2} \mathbf{c}_i^{\mathbf{r}_2}) \right\| \\ &\leq \sum_{i=1}^T \left\| \mathbf{A}_l f^{l-1}(w_i^{\mathbf{r}_1} \mathbf{c}_i^{\mathbf{r}_1}) - \mathbf{A}_l f^{l-1}(w_i^{\mathbf{r}_2} \mathbf{c}_i^{\mathbf{r}_2}) \right\|. \end{aligned} \tag{3}$$

Based on above inequality and Lemma 1, we have

$$\begin{aligned}
& \left\| \mathbf{A}_l f^{l-1}(w_i^{\mathbf{r}_1} \mathbf{c}_i^{\mathbf{r}_1}) - \mathbf{A}_l f^{l-1}(w_i^{\mathbf{r}_2} \mathbf{c}_i^{\mathbf{r}_2}) \right\| \\
& \leq \|\mathbf{A}_l\| \left\| f^{l-1}(w_i^{\mathbf{r}_1} \mathbf{c}_i^{\mathbf{r}_1}) - f^{l-1}(w_i^{\mathbf{r}_2} \mathbf{c}_i^{\mathbf{r}_2}) \right\| \\
& \leq \prod_{j=1}^l \|\mathbf{A}_j\| \|w_i^{\mathbf{r}_1} \mathbf{c}_i^{\mathbf{r}_1} - w_i^{\mathbf{r}_2} \mathbf{c}_i^{\mathbf{r}_2}\| \\
& = K \|w_i^{\mathbf{r}_1} \mathbf{c}_i^{\mathbf{r}_1} - w_i^{\mathbf{r}_2} \mathbf{c}_i^{\mathbf{r}_2}\|.
\end{aligned} \tag{4}$$

Therefore,

$$\begin{aligned}
vrr(\mathbf{r}_1, \mathbf{r}_2; \mathbf{F}') & \leq \sum_{i=1}^T K \|w_i^{\mathbf{r}_1} \mathbf{c}_i^{\mathbf{r}_1} - w_i^{\mathbf{r}_2} \mathbf{c}_i^{\mathbf{r}_2}\| \\
& < K \sum_{i=1}^T \epsilon/T = K\epsilon
\end{aligned} \tag{5}$$

□

**Lemma 2.**  $\mathbf{F}_{app}(\mathbf{x}, \mathbf{d}) = \mathbf{F}_{sh}(\mathbf{x})\Gamma(\mathbf{d}) + \mathbf{v}$ , where  $\Gamma(\mathbf{d}) : \mathbb{R}^{2 \times 1} \rightarrow \mathbb{R}^{\ell \times 1}$  is the spherical harmonic basis function,  $\mathbf{F}_{sh}(\mathbf{x}) : \mathbb{R}^{3 \times 1} \rightarrow \mathbb{R}^{3 \times \ell}$  is the coefficient function, and  $\mathbf{v} \in \mathbb{R}^{3 \times 1}$ . Given  $\mathbf{A} \in \mathbb{R}^{3 \times 3}$ ,  $\mathbf{b} \in \mathbb{R}^{3 \times 1}$ , then  $\mathbf{AF}_{app}(\mathbf{x}, \mathbf{d}) + \mathbf{b} \Leftrightarrow \mathbf{AF}_{sh}(\mathbf{x}) + 2\sqrt{\pi}[\mathbf{Av} + \mathbf{b} - \mathbf{v}, \mathbf{0}]$ .

*Proof.*

$$\begin{aligned}
\mathbf{AF}_{app}(\mathbf{x}, \mathbf{d}) + \mathbf{b} & = \mathbf{A}(\mathbf{F}_{sh}(\mathbf{x})\Gamma(\mathbf{d}) + \mathbf{v}) + \mathbf{b} \\
& = \mathbf{AF}_{sh}(\mathbf{x})\Gamma(\mathbf{d}) + \mathbf{Av} + \mathbf{b} \\
& = \mathbf{AF}_{sh}(\mathbf{x})\Gamma(\mathbf{d}) + \mathbf{Av} + \mathbf{b}.
\end{aligned} \tag{6}$$

Because the first component of the spherical harmonic basis function outputs a constant value  $\frac{1}{2\sqrt{\pi}}$ , we have

$$\begin{aligned}
& (\mathbf{AF}_{sh}(\mathbf{x}) + 2\sqrt{\pi}[\mathbf{Av} + \mathbf{b} - \mathbf{v}, \mathbf{0}])\Gamma(\mathbf{d}) + \mathbf{v} \\
& = \mathbf{AF}_{sh}\Gamma(\mathbf{d}) + \mathbf{Av} + \mathbf{b} - \mathbf{v} + \mathbf{v} \\
& = \mathbf{AF}_{sh}\Gamma(\mathbf{d}) + \mathbf{Av} + \mathbf{b}
\end{aligned} \tag{7}$$

□

**Remark of Lemma 2.** Similarly, it can prove  $\mathbf{AF}_{sh}(\mathbf{x}) + [\mathbf{b}, \mathbf{0}] \Leftrightarrow \mathbf{AF}_{app}(\mathbf{x}, \mathbf{d}) + \frac{\mathbf{b}}{2\sqrt{\pi}} + \mathbf{v} - \mathbf{Av}$ .

**Proposition 3.** Considering  $f(\mathbf{x}) = \mathbf{Ax} + \mathbf{b}$ ,  $\mathbf{A} \in \mathbb{R}^{3 \times \ell}$ ,  $\mathbf{b} \in \mathbb{R}^{3 \times \ell}$ , if  $\mathbf{F}'_{sh} = f \circ \mathbf{F}_{sh}$ ,  $\sum_{i=1}^T w_i = 1$ ,  $vrr(\mathbf{r}_1, \mathbf{r}_2; \mathbf{F}) < \epsilon_1$  and  $\|\Gamma(\mathbf{d}^{\mathbf{r}_1}) - \Gamma(\mathbf{d}^{\mathbf{r}_2})\| < \epsilon_2$ , we have  $vrr(\mathbf{r}_1, \mathbf{r}_2; \mathbf{F}') < K_1\epsilon_1 + K_2\epsilon_2$ , where  $K_1 = \|\mathbf{A}\|_2$  and  $K_2 = \|\mathbf{b}\|_2$ . Moreover, if  $\mathbf{b}$  vanishes except for the first column (i.e., the form in above remark),  $vrr(\mathbf{r}_1, \mathbf{r}_2; \mathbf{F}') < K_1\epsilon_1$ .

*Proof.*

$$\begin{aligned}
& vrr(\mathbf{r}_1, \mathbf{r}_2; \mathbf{F}') \\
& = \|C(\mathbf{r}_1; \mathbf{F}') - C(\mathbf{r}_2; \mathbf{F}')\| \\
& = \left\| \sum_{i=1}^T w_i^{\mathbf{r}_1} \mathbf{F}'(\mathbf{x}_i^{\mathbf{r}_1})\Gamma(\mathbf{d}^{\mathbf{r}_1}) - \sum_{i=1}^T w_i^{\mathbf{r}_2} \mathbf{F}'(\mathbf{x}_i^{\mathbf{r}_2})\Gamma(\mathbf{d}^{\mathbf{r}_2}) \right\| \\
& \leq \left\| \sum_{i=1}^T w_i^{\mathbf{r}_1} \mathbf{AF}(\mathbf{x}_i^{\mathbf{r}_1})\Gamma(\mathbf{d}^{\mathbf{r}_1}) - \sum_{i=1}^T w_i^{\mathbf{r}_2} \mathbf{AF}(\mathbf{x}_i^{\mathbf{r}_2})\Gamma(\mathbf{d}^{\mathbf{r}_2}) \right\| \\
& \quad + \|\mathbf{b}\Gamma(\mathbf{d}^{\mathbf{r}_1}) - \mathbf{b}\Gamma(\mathbf{d}^{\mathbf{r}_2})\| \\
& \leq \|\mathbf{A}\| vrr(\mathbf{r}_1, \mathbf{r}_2; \mathbf{F}) + \|\mathbf{b}\| \|\Gamma(\mathbf{d}^{\mathbf{r}_1}) - \Gamma(\mathbf{d}^{\mathbf{r}_2})\| \\
& < K_1\epsilon_1 + K_2\epsilon_2.
\end{aligned} \tag{8}$$

If  $\mathbf{b}$  vanishes except for the first column,  $\|\mathbf{b}\Gamma(\mathbf{d}^{\mathbf{r}_1}) - \mathbf{b}\Gamma(\mathbf{d}^{\mathbf{r}_2})\| = 0$ , thus  $vrr(\mathbf{r}_1, \mathbf{r}_2; \mathbf{F}') < K_1\epsilon_1$ . □

**Remarks.** Prop. 3 extends Lipschitz-constrained linear mapping in Prop. 1 from appearance representation to spherical harmonics. To prove the bound of Lipschitz MLP applied to spherical harmonics, some fussy assumptions are further required, and the proof will be trivial to repeat the above proving processes. We believe the three propositions have exhibited the intuition and importance of Lipschitz transformations for this task.

## B. More results

For comprehensive analysis and evaluation, we have supplied a video in the supplementary materials, which contains the continuous novel views of multiple scenes stylized with various references. It can be observed that, both WCT<sup>2</sup> and CCPL create noises and disharmony to affect the photorealism of video. In specific, WCT<sup>2</sup> is likely to sharpen the edges excessively that produces artificial boundaries around edges (e.g., the trex and room scenes). It also generates noticeable noises in some stylized scenes. The results of CCPL usually have richer colors that enhances the visual effects. However, the variegated colors acceptable in a still image may be harmful to 3D scenes. For example, in the trex and fortress scenes, the interframe variations of colors results in artifacts and inconsistency of videos. In the flower scene, due to the inconsistency, the colorful leaves and flowers seem to be unrealistic and flickering. In contrast, LipRF can alleviate these downsides to generate more consistent and photorealistic stylized novel views while transferring the color style. The videos of LipRF are more like camera shots to meet the requirement of photorealistic 3D scene stylization.
